**Release of extracellular DNA by *Pseudomonas* species as a major determinant for biofilm switching and an early indicator for cell population control**

**Fatemeh Bajoul Kakahi<sup>1</sup>, Juan Andres Martinez<sup>1</sup>, Fabian Moreno Avitia<sup>1</sup>, Samuel Telek<sup>1</sup>,  
Daniel C. Volke<sup>2</sup>, Nicolas T. Wirth<sup>2</sup>, Pablo I. Nickel<sup>2</sup>, Frank Delvigne<sup>1\*</sup>**

<sup>1</sup>Terra Research and Teaching Centre, Microbial Processes and Interactions (MiPI), Gembloux Agro-Bio Tech, University of Liege, Gembloux, Belgium.

<sup>2</sup>The Novo Nordisk Foundation Center for Biosustainability, Technical University of Denmark, 2800 Kongens Lyngby, Denmark.

\*Corresponding author: [F.Delvigne@uliege.be](mailto:F.Delvigne@uliege.be)

The authors have withdrawn this manuscript due to a duplicate posting of manuscript number BIORXIV/2021/430776. Therefore, the authors do not wish this work to be cited as reference for the project. If you have any questions, please contact the corresponding author. The correct preprint can be found at doi: 10.1101/2021.02.11.430776
